# Supplementary material
Source: PubMed Central journal article supplement (PMC3958033)
Supplement: MCB.01202-13_zmb999100342so1.pdf [file MCB.01202-13_zmb999100342so1.pdf]

# **Runx3 Regulates Interleukin-15 Dependent Natural Killer Cell Activation**

## **Supplemental material**

### **Files in this data supplement:**

**Supplemental file 1**

**Figures S1-S6**

**Tables S1-S6 (Tables S4 and S6 are appended as separate Excel files)**

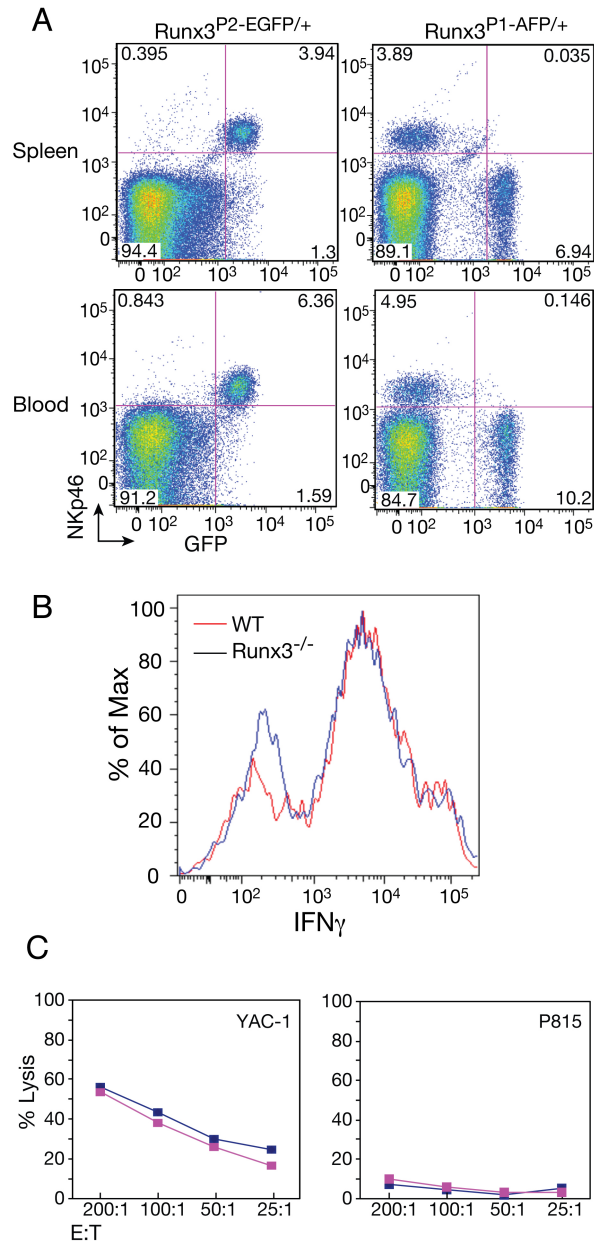

**Supplementary Figure S1** Runx3 expression and function in NKCs under resting conditions. (A) Analysis of Runx3<sup>P1-AFP/+</sup> and Runx3<sup>P2-EGFP/+</sup> expression in spleen and blood. Lymphocytes were analyzed for co-expression of NKp46 and either P1, or P2-derived GFP. (B) IFN $\gamma$  production by WT and Runx3<sup>-/-</sup> spleen NKCs. Splenocytes were analyzed for intracellular IFN $\gamma$  production. (C) PolyI:C treated WT and Runx3<sup>-/-</sup> splenocytes were analyzed for cytotoxicity against the YAC-1 and P815 cell lines.

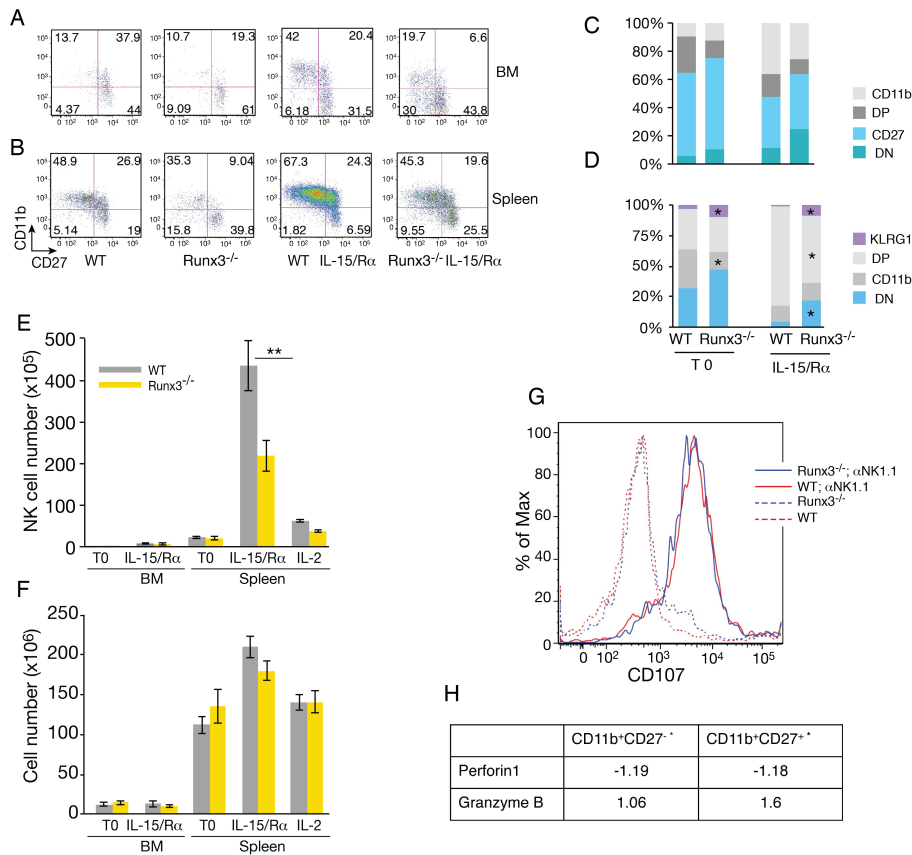

**Supplementary Figure S2** Accumulation and maturation of WT and Runx3<sup>-/-</sup> NKCs following IL-2/15 *in vivo* activation. (A) Representative dot plots comparing maturation stages of WT and Runx3<sup>-/-</sup> BM NKCs under resting and *in-vivo* IL-15/Rα activation based on expression of CD11b and CD27. (B) Representative dot plots comparing maturation stages of WT and Runx3<sup>-/-</sup> spleen NKCs under resting and *in vivo* IL-15/Rα activation based on expression of CD11b and CD27. (C) Bar graphs showing the frequency of WT and Runx3<sup>-/-</sup> BM NKC subsets under resting conditions (left) and following IL-15/Rα activation (right) based on expression of CD11b and CD27. Mean values are shown for the four NKC sub-populations (n=3). (D) Bar graphs showing the frequency WT and Runx3<sup>-/-</sup> spleen NKC sub-populations under resting conditions (T0) or following IL-15/Rα activation, based on CD11b and KLRG1. Mean values are shown for the four populations (n=5). Significance: WT vs Runx3<sup>-/-</sup> NKC- \*p<0.01. KLRG1=KLRG1<sup>+</sup>CD11b<sup>-</sup>; DP=KLRG1<sup>+</sup>CD11b<sup>+</sup>; CD11b=KLRG1<sup>-</sup>CD11b<sup>+</sup>; DN=KLRG1<sup>-</sup>CD11b<sup>-</sup>. (E) Number of NKp46<sup>+</sup> NKCs in WT and Runx3<sup>-/-</sup> BM and spleen under resting conditions (T0) and following

administration of IL-15/R $\alpha$  or IL-2. Significance: \*\*p<0.001. (F) Total number of cells in WT and Runx3<sup>-/-</sup> BM and spleen under resting conditions (T0) and following administration of IL-15/R $\alpha$  or IL-2. (G) Degranulation of IL-15/R $\alpha$  treated NKCs. Forty eight hours after IL-15/R $\alpha$  administration splenocytes were stimulated with anti-NK1.1 for 4 hours and stained with anti-CD107. (H) Fold change of cytotoxic mediators in mature IL-15/R $\alpha$  activated NKC (\* marks the ratio between Runx3<sup>-/-</sup> and WT expression level in data from microarray analysis).

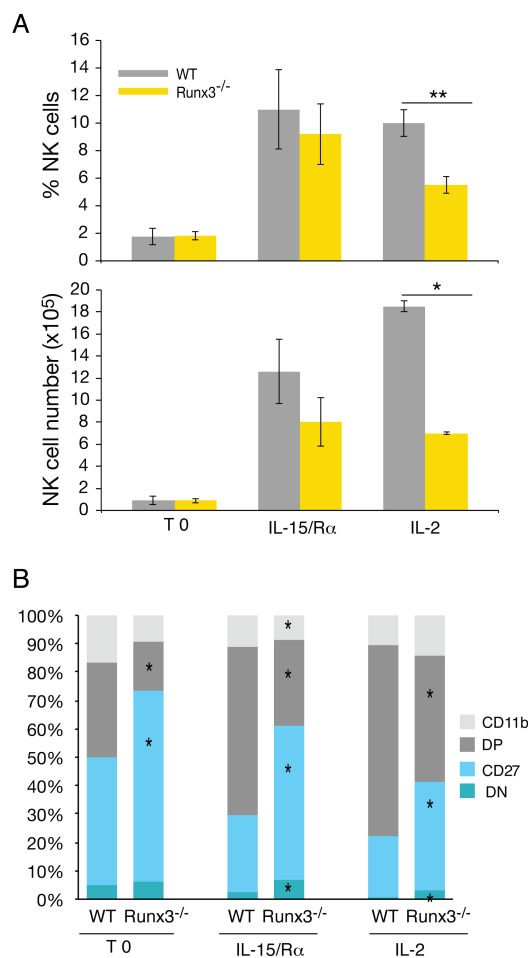

**Supplementary Figure S3.** Accumulation and maturation of peritoneal NKCs following administration of IL-15/R $\alpha$  or IL-2 is severely affected by loss of Runx3. (A) Percentage (upper panel) and cell number (lower panel) of peritoneal NKp46<sup>+</sup> NKCs in WT and Runx3<sup>-/-</sup> mice under resting conditions (T0) (n=5) and after injection of IL-15/R $\alpha$  (n=4) or IL-2 (n=3). Significance: \*\*p<0.01, \*p< 0.05. (B) Bar graphs showing the frequency of WT and Runx3<sup>-/-</sup> peritoneal NKC sub-populations under resting conditions or following administration of IL-15/R $\alpha$  or IL-2. Mean values are shown for the four sub-populations based on expression of CD11b and CD27. Significance: WT vs Runx3<sup>-/-</sup> NK cells \*\*p<0.01, \*p<0.05.

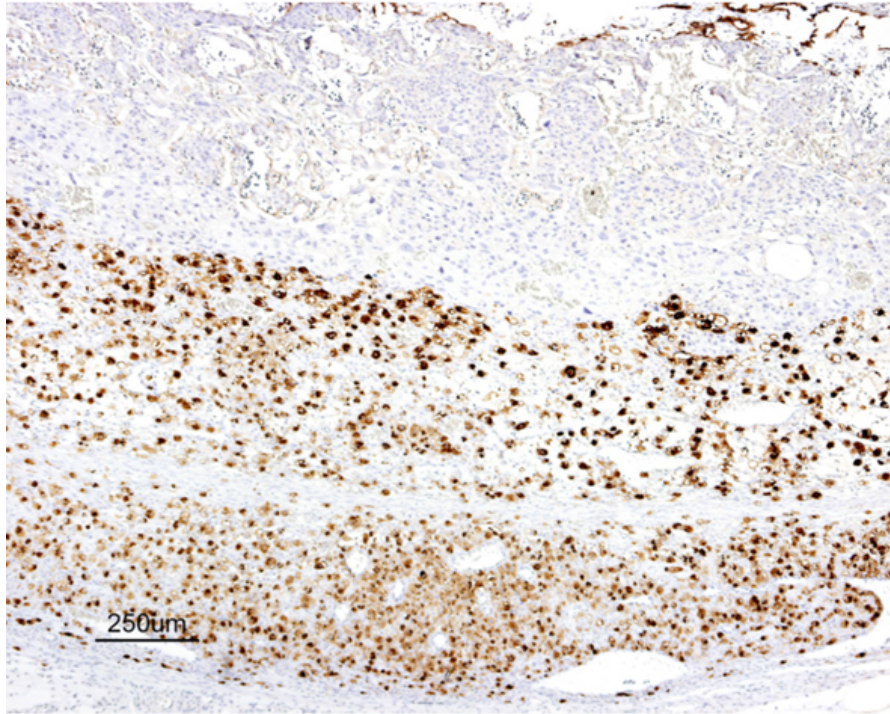

**Supplementary Figure S4** uNKCs are present in deciduae of mice ablated of Runx3 in DCs. DBA staining of a gd10.5 decidua of Runx3<sup>fl/fl</sup>/CD11c::Cre female.

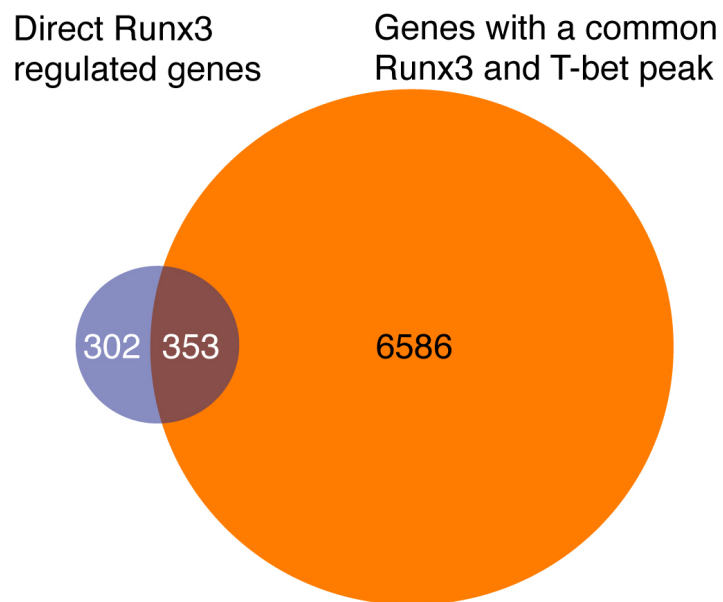

**Supplementary Figure S5** Runx3-regulated genes that harbor Runx3 peaks overlapping T-bet peaks in Th1 cells. Intersection between the list of Runx3-regulated genes from *in vivo* IL-15/R $\alpha$ -activated NKCs and the list of genes harboring both Runx3 peaks in NKCs and T-bet peaks in Th1 cells.

A

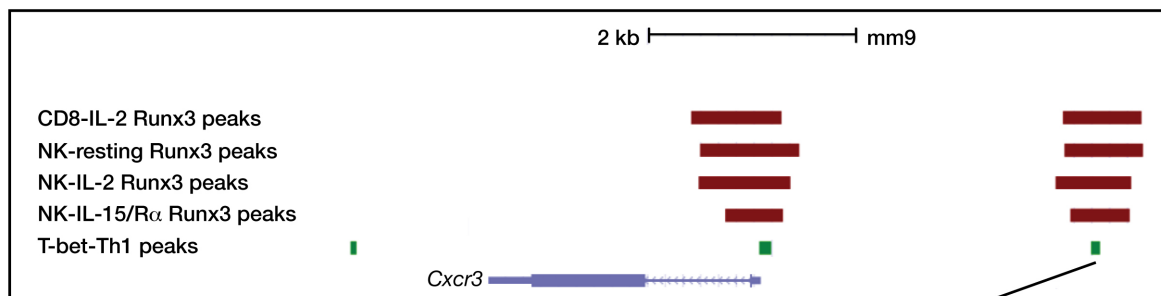

B

|           |                                                                    |
|-----------|--------------------------------------------------------------------|
| Mouse     | gTTTT-----cattcttTcacacctc-tgagctgtggttTggggagac----aggaggctgg     |
| Rat       | gTTTT-----cattcttTcacacctc-tgagctgtggttTggggagac----aggaggctgg     |
| Human     | -TTTT-----ctTTTTTcacacctc-tgggctgtggttTgaggagat----gggaggctca      |
| Orangutan | -TTTT-----ctTTTTTcacacctc-tgggctgtggttTgaggagat----gggaggctca      |
| Dog       | -TTTT-----cttcttTcacacctc-tgggctgtggttTggggagat----gggaggctca      |
| Horse     | -TTTT-----tttattctTcacacctc-taggctgtggttTggggagat----gggaggctcc    |
| Opossum   | -gcttTgagctgctgtTgtctTcacacctt-ggggctgtggtTgggggggag----ggaa--catg |

T-bet                      RBS

**Supplementary Figure S6** Runx3 and T-bet co-binding to the *Cxcr3* promoter and enhancer. (A) The genomic region of *Cxcr3* with location of Runx3 peaks (RBS) in resting and *in-vivo* IL-15/R $\alpha$ -activated NKC and the location of T-bet peaks [2] in Th1 CD4<sup>+</sup> T cells. (B) The conserved RUNX and T-bet binding sites in the *Cxcr3* enhancer.

**Supplementary Table S1** Sequence of primers used for qPCR

| <b>Gene name</b> | <b>Sequence - 5' - 3'</b>                            |
|------------------|------------------------------------------------------|
| <i>Actb</i>      | F-ggctgtattccctccatcg<br>R-ccagttggtaacaatgccatgt    |
| <i>Prdm1</i>     | F-ttctcttggaanaaacgtgtggg<br>R-ggagccggagctagacttg   |
| <i>Tnfrsf9</i>   | F-cgtgcagaactcctgtgataac<br>R-gtccacctatgctggagaagg  |
| <i>Styk1</i>     | F-ggatcacctaagcnaaaaagt<br>R-tgtaccagttctgtgtttcc    |
| <i>Crtam</i>     | F-cttttcacatcgttcagctct<br>R-ggagcctggctgctattctc    |
| <i>CD96</i>      | F-tgggaagagctattcaatgttg<br>R-agaggccatattgggatgataa |
| <i>Tigit</i>     | F-gaatggaacctgaggagtctct<br>R-agcaatgaagctcttaggct   |
| <i>Tspan32</i>   | F-tgcgctattgggccttctatg<br>R-caccaggatgcagaatgacag   |
| <i>Cx3cr1</i>    | F-cggccatcttagtggcgtc<br>R-ggatgtgactccgagttgc       |
| <i>Itgb7</i>     | F-acctgagctactcaatgaagga<br>R-caccgtttgtccacgaagg    |



**Supplementary Table S2** Presence of uNKCs at implantation sites in pregnant mice

| WT | DC <sup>Runx3<sup>-/-</sup></sup> | Runx3 <sup>-/-</sup> | Runx3 <sup>-/-</sup> plus progesterone |
|----|-----------------------------------|----------------------|----------------------------------------|
| +  | +                                 | -                    | -                                      |

\*Progesterone (0.2mg) was injected daily between gd2.5-5.5

**Supplementary Table S3** Enriched ontology terms identified by GREAT in Runx3 peaks of *in-vivo* IL-15/R $\alpha$ -activated NKCs.

|                 | <b>Term name</b>                          | <b>Binom FDR q-value</b> | <b>Binom Fold enrichment</b> | <b>Hyper FDR q-value</b> | <b>Hyper Fold-enrichment</b> |
|-----------------|-------------------------------------------|--------------------------|------------------------------|--------------------------|------------------------------|
| Mouse phenotype |                                           |                          |                              |                          |                              |
|                 | Abnormal T cell physiology                | 4.13e <sup>-179</sup>    | 2.022                        | 6.7e <sup>-37</sup>      | 1.418                        |
|                 | Increased T cell number                   | 4.20e <sup>-116</sup>    | 2.075                        | 1.1e <sup>-17</sup>      | 1.377                        |
|                 | Abnormal T cell activation                | 1.8e <sup>-102</sup>     | 2.001                        | 1.53e <sup>-23</sup>     | 1.433                        |
|                 | Abnormal T cell proliferation             | 1.2e <sup>-96</sup>      | 2.031                        | 5.07e <sup>-21</sup>     | 1.429                        |
| Panther pathway |                                           |                          |                              |                          |                              |
|                 | Apoptosis signaling                       | 9.33e <sup>-43</sup>     | 2.338                        | 2.28e <sup>-7</sup>      | 1.422                        |
|                 | T cell activation                         | 6.95e <sup>-12</sup>     | 2.222                        | 1.69e <sup>-3</sup>      | 1.406                        |
|                 | JAK/STAT signaling                        | 1.93e <sup>-14</sup>     | 3.722                        | 2.16e <sup>-3</sup>      | 1.652                        |
| Pathway commons |                                           |                          |                              |                          |                              |
|                 | IL-2 mediated signaling events            | 1.92e <sup>-64</sup>     | 2.538                        | 3.13e <sup>-14</sup>     | 1.568                        |
| MSigDB pathway  |                                           |                          |                              |                          |                              |
|                 | Natural killer cell mediated cytotoxicity | 3.84e <sup>-78</sup>     | 2.912                        | 1.45e <sup>-7</sup>      | 1.360                        |

**Supplementary Table S4** Lists of differentially expressed genes in CD11b, DP and CD27 subpopulations of Runx3<sup>-/-</sup> vs WT NKC and the list of 655 Runx3-regulated genes in IL-15/R $\alpha$  *in-vivo* activated NKC, including down-regulated and up-regulated genes in Runx3<sup>-/-</sup> (see a separate Excel file).

**Supplementary Table S5** Enriched ontology terms identified by Ingenuity<sup>®</sup> for Runx3-regulated genes of *in vivo* IL-15-activated NKCs.

| <b>Category</b>                   | <b>Count</b> | <b>Percent</b> | <b>P-value</b>                             |
|-----------------------------------|--------------|----------------|--------------------------------------------|
| Cellular growth and proliferation | 169          | 30             | 6.11E <sup>-18</sup> -5.98E <sup>-04</sup> |
| Cell death                        | 182          | 33             | 1.59E <sup>-17</sup> -6.79E <sup>-04</sup> |
| Cell movement                     | 126          | 23             | 8.65E <sup>-12</sup> -5.44E <sup>-04</sup> |

**Supplementary Table S6** List of Runx3 candidate target genes in IL-15 cultured NK cells.

Transcriptome comparisons between WT and Runx3<sup>-/-</sup> NKCs that were cultured for 7 days in the presence of IL-15 revealed 1222 differentially expressed; Runx3-responsive genes (fold change  $\geq 1.5$ ,  $p < 0.05$ ). To delineate the candidate Runx3-regulated gene subset, the group of 1222 differentially expressed genes in IL-15-activated NKC was intersected with the list of Runx3 occupied genes that contain bound RUNX motifs (in *in-vivo* IL-15 activated NKC). This analysis revealed 791 Runx3-regulated genes, of which 359 genes were up-regulated and 432 genes were down-regulated in Runx3<sup>-/-</sup> NKCs compared to WT (see a separate Excel file).
